# Supplementary material for: Remarkable genomic diversity among Escherichia isolates recovered from healthy chickens
Source: PeerJ journal article supplement (doi:10.7717/peerj.12935), 2022-03-01
Supplement: Figure_S1.pdf [file Figure_S1.pdf]

# (A) ClermonTyping Phylogroups

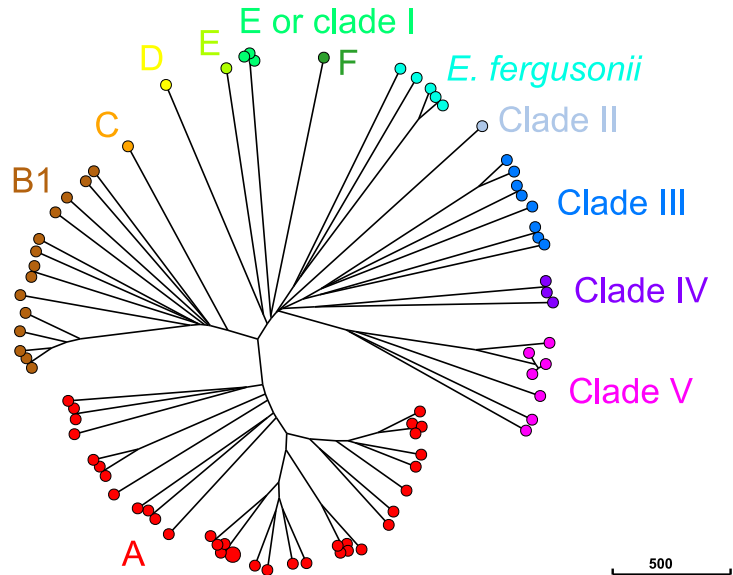

# (B) Collection Month

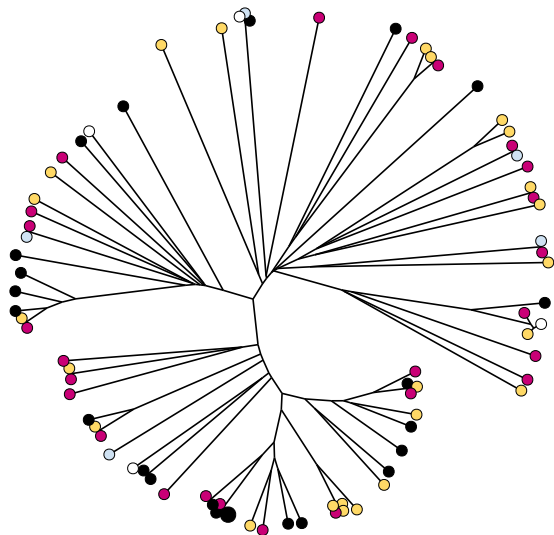

● July (23) ● August (25) ● September (24)

● October (5) ● November (4)
