# Supplementary material for: Remarkable genomic diversity among Escherichia isolates recovered from healthy chickens
Source: PeerJ. 2022 Mar 1;10:e12935. doi: 10.7717/peerj.12935 (PMC8896058; doi:10.7717/peerj.12935)
Supplement: Supplemental Information 3 — Isolate name: strain name used for this paper. UoS isolate ID: alternative strain ID used for internal cataloguing. 2ndry ID: alternative ID describing multiple strains isolated from individual chickens (Chicken#-isolate#). ND: not detected. *: multiple alleles detected, possibly from split contig within gene. [file peerj-10-12935-s003.xlsx]

## Sheet: Table S1
Table S1: Metadata associated with 100 Escherichia isolates from faecal samples of healthy Lohmann Brown layer hens.
Isolate name: strain name used for this paper.
UoS isolate ID: alternative strain ID used for internal cataloguing.
2ndry ID: alternative ID describing multiple strains isolated from individual chickens (Chicken#-isolate#).
ND: not detected.
*: multiple alleles detected, possibly from split contig within gene.
											Disk diffusion (mm halo) - Red if resistant (EUCAST)								MIC (µg/ml)
Isolate name	UoS isolate ID	Species	Source	2ndry ID	Collection date	Morphology MacConkey 3 agar	Lactose	CHROMagar Orientation	Indole test	(GTG)5 PCR	Gentamicin 10ug	Ampicillin 10ug	Trimethoprim 5ug	Chloramphenicol 30ug	Nitrofurantoin 100ug	Cefpodoxime 10ug	Meropenem 10ug	Ciprofloxacin 5ug	Colistin (4-0.25)	O antigen	H antigen	fimH type	Predicted phylogroup (ClermonTyping)	Final Phylogroup (core SNP alignment)	HC0 cluster	MLST	ST complex	Biosample accession	GenBank accession
Surrey001	2221	Escherichia coli	Healthy chicken	C1-1	2018-07-09	Pink, circular, bile salts	+	Purple	+	A	23	23	32	28	24	30	36	36	< 0.25	O136	H51	fimH38	B1	B1	148600	297	-	SAMN20959614	GCA_019841625.1
Surrey002	2223	Escherichia coli	Healthy chicken	C1-3	2018-07-09	White, circular	-	Purple	+	B	26	34	38	30	14	34	44	32	< 0.25	-	H20	ND	B1	B1	148604	155	ST155 Cplx	SAMN20959615	GCA_019840585.1
Surrey003	2226	Escherichia coli	Healthy chicken	C1-6	2018-07-09	Pink, circular, bile salts	+	Purple	+	E	24	22	30	27	24	28	32	34	< 0.25	O4	H16	fimH400	A	A	148605	48	ST10 Cplx	SAMN20959616	GCA_019841605.1
Surrey004	2227	Escherichia coli	Healthy chicken	C1-7	2018-07-09	Pink, circular, bile salts	+	Purple	+	F	24	26	34	28	21	30	34	34	< 0.25	O118 or O151	H29	fimH400	A	A	148603	48	ST10 Cplx	SAMN20959617	GCA_019841565.1
Surrey005	2228	Escherichia coli	Healthy chicken	C1-8	2018-07-09	Pink, circular, bile salts, mucoid	+	Purple	+	G	21	23	30	27	22	28	34	36	< 0.25	O13	H48	fimH32	A	A	148532	10	ST10 Cplx	SAMN20959618	GCA_019841685.1
Surrey006	2231	Escherichia coli	Healthy chicken	C2-1	2018-07-09	Pink, circular, bile salts	+	Purple	+	A	25	27	34	28	23	32	38	32	< 0.25	O136	H38	fimH167	A	A	148542	1638	ST10 Cplx	SAMN20959619	GCA_019841665.1
Surrey007	2232	Escherichia coli	Healthy chicken	C2-2	2018-07-09	Pink, circular, bile salts	+	Purple	+	B	23	25	30	28	20	29	36	34	< 0.25	-	H10	fimH121	B1	B1	148529	155	ST155 Cplx	SAMN20959620	GCA_019841645.1
Surrey008	2233	Escherichia whittamii	Healthy chicken	C2-3	2018-07-09	Pink, circular, bile salts	+	Purple	+	C	24	26	34	28	22	30	36	36	< 0.25	O19	-	ND	cladeII	cladeII	148546	11509	-	SAMN20959621	GCA_020283705.1
Surrey009	2234	Escherichia coli	Healthy chicken	C2-4	2018-07-09	White, irregular	-	Purple	+	D	25	26	29	28	24	30	36	28	< 0.25	O4	H16	fimH400	A	A	148530	48	ST10 Cplx	SAMN20959622	GCA_019841545.1
Surrey010	2235	Escherichia coli	Healthy chicken	C2-5	2018-07-09	White, irregular	-	Purple	+	E	25	25	32	26	24	34	38	36	< 0.25	O100	H32	fimH23	A	A	148523	10	ST10 Cplx	SAMN20959623	GCA_019841585.1
Surrey011	2238	Escherichia coli	Healthy chicken	C2-8	2018-07-09	Pink, irregular, white edge	+	Purple	+	F	23	22	30	27	24	30	36	34	< 0.25	O48	H21	fimH121	B1	B1	148524	155	ST155 Cplx	SAMN20959624	GCA_019841465.1
Surrey012	2241	Escherichia coli	Healthy chicken	C3-1	2018-07-09	Pink, circular, bile salts	+	Purple	+	A	25	23	34	29	24	28	35	35	< 0.25	-	H32	ND	A	A	148533	685	ST10 Cplx	SAMN20959625	GCA_019841525.1
Surrey013	2242	Escherichia coli	Healthy chicken	C3-2	2018-07-09	Pink, circular, bile salts	+	Purple	+	B	24	26	30	30	23	32	36	36	< 0.25	O8	H4	fimH32	B1	B1	148526	58	ST155 Cplx	SAMN20959626	GCA_019841505.1
Surrey014	2243	Escherichia coli	Healthy chicken	C3-3	2018-07-09	Pink, circular, bile salts, mucoid	+	Purple	+	C	24	23	30	26	24	29	36	28	< 0.25	O25	H11	ND	A	A	148527	48	ST10 Cplx	SAMN20959627	GCA_019841705.1
Surrey015	2245	Escherichia coli	Healthy chicken	C3-5	2018-07-09	Pink, irregular, bile salts	+	Purple	+	E	24	24	34	26	25	30	36	34	< 0.25	-	H16	fimH53	B1	B1	148528	2598	-	SAMN20959628	GCA_019841715.1
Surrey016	2248	Escherichia coli	Healthy chicken	C3-8	2018-07-09	Pink, circular, bile salts	+	Purple	+	F	23	26	32	26	25	28	34	34	< 0.25	O55	H10	*	A	A	148534	1112	-	SAMN20959629	GCA_019841475.1
Surrey017	2249	Escherichia coli	Healthy chicken	C3-9	2018-07-09	Pink, circular, bile salts	+	Purple	+	G	24	22	32	28	24	28	36	34	< 0.25	O8	H9	fimH35	C	C	148565	23	ST23 Cplx	SAMN20959630	GCA_019841785.1
Surrey018	2251	Escherichia coli	Healthy chicken	C4-1	2018-07-09	Pink, circular, bile salts, white edge	+	Purple	+	A	22	25	32	27	24	30	34	34	< 0.25	O151	H29	fimH400	A	A	148555	48	ST10 Cplx	SAMN20959631	GCA_019841825.1
Surrey019	2252	Escherichia coli	Healthy chicken	C4-2	2018-07-09	Pink, circular, bile salts	+	Purple	+	B	24	23	30	29	24	28	35	36	< 0.25	O8	H49	fimH38	A	A	148564	1844	-	SAMN20959632	GCA_019841375.1
Surrey020	2254	Escherichia marmotae	Healthy chicken	C4-4	2018-07-09	Pink, irregular, bile salts, white edge	+	Purple	+	D	23	23	32	28	24	30	36	34	< 0.25	-	uncertain	*	cladeV	cladeV	148607	11513	-	SAMN20959633	GCA_019840835.1
Surrey021	2255	Escherichia fergusonii	Healthy chicken	C4-5	2018-07-09	Pink, circular, bile salts	+	Purple	+	E	24	24	30	26	25	30	36	34	< 0.25	-	uncertain	ND	fergusonii	fergusonii	148525	5643	-	SAMN20959634	GCA_019841415.1
Surrey022	2256	Escherichia coli	Healthy chicken	C4-6	2018-07-09	Pink, circular, bile salts	+	Purple	+	F	21	20	29	24	17	24	34	34	< 0.25	O154	H4	fimH54	A	A	148535	10	ST10 Cplx	SAMN20959635	GCA_019841445.1
Surrey023	2259	Escherichia coli	Healthy chicken	C4-9	2018-07-09	Pink, circular, bile salts, mucoid	+	Purple	+	G	22	22	28	25	22	27	32	32	< 0.25	O136	H38	fimH167	A	A	148531	1638	ST10 Cplx	SAMN20959636	GCA_019841405.1
Surrey024	2261	Escherichia coli	Healthy chicken	C5-1	2018-07-09	Pink, circular, bile salts	+	Purple	+	A	22	24	32	28	26	28	35	35	< 0.25	-	H11	fimH54	A	A	148537	48	ST10 Cplx	SAMN20959637	GCA_019841345.1
Surrey025	2262	Escherichia coli	Healthy chicken	C5-2	2018-07-09	White, irregular	-	Purple	+	B	21	30	38	30	23	34	36	36	< 0.25	O6	H45	fimH995	E or cladeI	D	148547	5573	-	SAMN20959638	GCA_019840625.1
Surrey026	2263	Escherichia coli	Healthy chicken	C5-3	2018-07-09	Pink, circular, bile salts	+	Purple	+	C	22	26	30	30	25	32	36	36	< 0.25	O55	H27	fimH41	A	A	148541	1112	-	SAMN20959639	GCA_019840785.1
Surrey027	2265	Escherichia coli	Healthy chicken	C5-5	2018-07-09	Pink, circular, bile salts, mucoid	+	Purple	+	D	22	24	28	26	24	28	34	34	< 0.25	O4	H16	fimH400	A	A	148544	48	ST10 Cplx	SAMN20959640	GCA_019840825.1
Surrey028	2269	Escherichia coli	Healthy chicken	C5-9	2018-07-09	White, circular	-	Purple	+	B	22	32	36	29	23	34	36	38	< 0.25	O8	H25	fimH23	A	A	148540	48	ST10 Cplx	SAMN20959641	GCA_019841365.1
Surrey029	2270	Escherichia marmotae	Healthy chicken	C5-10	2018-07-09	Pink, irregular, bile salts	+	Purple	+	E	21	22	30	27	23	28	34	32	< 0.25	OX10	H56	*	cladeV	cladeV	148545	11510	-	SAMN20959642	GCA_019841305.1
Surrey030	2302	Escherichia ruysiae	Healthy chicken	C6-1	2018-08-13	White, irregular	-	Purple	+	A	24	28	32	30	25	34	42	38	< 0.25	-	uncertain	fimH610	cladeIII	cladeIII	148538	3568	-	SAMN20959643	GCA_019840805.1
Surrey031	2303	Escherichia fergusonii	Healthy chicken	C6-2	2018-08-13	Pink, circular, bile salts	+	Purple	+	B	22	26	30	27	25	32	34	34	< 0.25	O120	-	ND	fergusonii	fergusonii	148543	11508	-	SAMN20959644	GCA_019840705.1
Surrey032	2304	Escherichia coli	Healthy chicken	C6-3	2018-08-13	Pink, circular, bile salts	+	Purple	+	C	21	25	33	27	24	30	36	34	< 0.25	-	H11	fimH54	A	A	148537	48	ST10 Cplx	SAMN20959645	GCA_019840655.1
Surrey033	2308	Escherichia coli	Healthy chicken	C6-7	2018-08-13	Pink, circular, bile salts, ~irregular (rugous)	+	Purple	+	F	21	25	30	28	24	28	34	35	< 0.25	O9	H4	fimH34	A	A	148550	46	ST46 Cplx	SAMN20959646	GCA_019840765.1
Surrey034	2309	Escherichia coli	Healthy chicken	C6-8	2018-08-13	Pink, circular, bile salts	+	Purple	+	G	21	25	32	28	22	30	34	34	< 0.25	O8	H51	fimH657	F	F	148548	1276	-	SAMN20959647	GCA_019840735.1
Surrey035	2310	Escherichia marmotae	Healthy chicken	C6-9	2018-08-13	Pink, circular, bile salts	+	Purple	+	H	22	26	30	30	22	30	34	34	< 0.25	O5	H56	*	cladeV	cladeV	148563	7416	-	SAMN20959648	GCA_019840725.1
Surrey036	2311	Escherichia coli	Healthy chicken	C6-10	2018-08-13	Pink, circular, bile salts, ~irregular (rugous)	+	Purple	+	I	21	25	34	28	22	32	34	32	< 0.25	O185	H16	fimH86	B1	B1	148549	2280	-	SAMN20959649	GCA_019840645.1
Surrey037	2314	Escherichia coli	Healthy chicken	C7-3	2018-08-13	Pink, circular, bile salts, ~irregular	+	Purple	+	C	20	25	30	27	24	30	34	32	< 0.25	-	H10	fimH121	B1	B1	148529	155	ST155 Cplx	SAMN20959650	GCA_019840665.1
Surrey038	2315	Escherichia coli	Healthy chicken	C7-4	2018-08-13	Pink, circular, bile salts	+	Purple	+	D	21	25	30	28	24	32	34	34	< 0.25	-	H10	fimH54	A	A	148552	2456	-	SAMN20959651	GCA_019841005.1
Surrey039	2318	Escherichia coli	Healthy chicken	C7-7	2018-08-13	Pink, circular, bile salts	+	Purple	+	G	21	24	32	30	24	30	34	34	< 0.25	-	H26	fimH388	A	A	148554	710	-	SAMN20959652	GCA_019841105.1
Surrey040	2319	Escherichia coli	Healthy chicken	C7-8	2018-08-13	Pink, circular, bile salts	+	Purple	+	H	22	24	30	26	24	28	35	34	< 0.25	O55	H27	fimH41	A	A	148551	1112	-	SAMN20959653	GCA_019841205.1
Surrey041	2320	Escherichia coli	Healthy chicken	C7-9	2018-08-13	Pink, circular, bile salts	+	Purple	+	I	20	0	30	30	21	28	34	34	< 0.25	O6	H45	fimH995	E or cladeI	D	148547	5573	-	SAMN20959654	GCA_019840535.1
Surrey042	2324	Escherichia coli	Healthy chicken	C8-3	2018-08-13	Pink, circular, bile salts	+	Purple	+	B	20	24	31	26	20	26	30	30	< 0.25	O118 or O151	H29	fimH400	A	A	148555	48	ST10 Cplx	SAMN20959655	GCA_019840605.1
Surrey043	2325	Escherichia fergusonii	Healthy chicken	C8-4	2018-08-13	Pink, circular, bile salts, ~irregular (rugous)	+	Purple	+	C	18	23	32	25	18	30	32	32	< 0.25	-	uncertain	ND	fergusonii	fergusonii	148525	5643	-	SAMN20959656	GCA_019841185.1
Surrey044	2326	Escherichia marmotae	Healthy chicken	C8-5	2018-08-13	Pink, circular, bile salts	+	Purple	+	D	18	24	28	24	20	28	32	32	< 0.25	O128	H56	*	cladeV	cladeV	148557	11511	-	SAMN20959657	GCA_019841255.1
Surrey045	2327	Escherichia fergusonii	Healthy chicken	C8-6	2018-08-13	Pink, circular, bile salts, ~irregular (rugous)	+	Purple	+	E	18	22	32	24	18	28	32	32	< 0.25	O45	H11	ND	fergusonii	fergusonii	148556	7059	-	SAMN20959658	GCA_019840975.1
Surrey046	2328	Escherichia coli	Healthy chicken	C8-7	2018-08-13	Pink, circular, bile salts	+	Purple	+	A	17	20	27	24	15	25	32	28	< 0.25	O182	H19	fimH94	A	A	148561	10	ST10 Cplx	SAMN20959659	GCA_019840545.1
Surrey047	2330	Escherichia ruysiae	Healthy chicken	C8-9	2018-08-13	Pink, circular, bile salts	+	Purple	+	G	17	23	30	20	18	24	30	28	< 0.25	uncertain	uncertain	*	cladeIII	cladeIII	148560	9287	-	SAMN20959660	GCA_019840505.1
Surrey048	2333	Escherichia coli	Healthy chicken	C9-2	2018-08-13	Pink, circular, bile salts	+	Purple	+	B	19	21	29	23	21	25	30	28	< 0.25	O4	H16	fimH400	A	A	148558	48	ST10 Cplx	SAMN20959661	GCA_019841165.1
Surrey049	2334	Escherichia coli	Healthy chicken	C9-3	2018-08-13	Pink, circular, bile salts, ~irregular	+	Purple	+	A	18	25	30	25	20	28	30	27	< 0.25	O13	H48	*	A	A	148566	746	ST10 Cplx	SAMN20959662	GCA_019841145.1
Surrey050	2338	Escherichia coli	Healthy chicken	C9-7	2018-08-13	Pink, circular, bile salts, mucoid	+	Purple	+	C	18	20	0	25	17	25	29	29	< 0.25	O8	H49	fimH38	B1	B1	148564	1844	-	SAMN20959663	GCA_019840965.1
Surrey051	2339	Escherichia coli	Healthy chicken	C9-8	2018-08-13	White, circular, ~irregular	-	Purple	+	F	19	25	28	25	20	26	30	32	< 0.25	O154	H4	fimH54	A	A	148559	10	ST10 Cplx	SAMN20959664	GCA_019840525.1
Surrey052	2340	Escherichia marmotae	Healthy chicken	C9-9	2018-08-13	Pink, circular, bile salts	+	Purple	+	H	19	24	30	25	21	26	30	26	< 0.25	-	H56	ND	cladeV	cladeV	151490	5391	-	SAMN20959665	GCA_019841085.1
Surrey053	2341	Escherichia coli	Healthy chicken	C9-10	2018-08-13	Pink, circular, bile salts	+	Purple	+	I	19	23	30	24	18	25	30	30	< 0.25	O88	H38	fimH86	A	A	148562	11512	ST10 Cplx	SAMN20959666	GCA_019841065.1
Surrey054	2343	Escherichia coli	Healthy chicken	C10-2	2018-08-13	White, circular, ~irregular	-	Purple	+	B	18	24	25	25	18	25	30	28	< 0.25	O79	H2	fimH890	B1	B1	148569	4173	-	SAMN20959667	GCA_019841045.1
Surrey055	2346	Escherichia coli	Healthy chicken	C10-5	2018-08-13	Pink, circular, bile salts	+	Purple	+	E	18	25	30	25	20	28	28	28	< 0.25	O136	H38	fimH167	A	A	148542	1638	ST10 Cplx	SAMN20959668	GCA_019840915.1
Surrey056	2348	Escherichia ruysiae	Healthy chicken	C10-7	2018-08-13	Pink, circular, bile salts, ~irregular (rugous)	+	Purple	+	G	17	23	28	25	17	24	32	30	< 0.25	uncertain	uncertain	fimH620	cladeIV	cladeIV	148568	4103	-	SAMN20959669	GCA_019839465.1
Surrey057	2349	Escherichia coli	Healthy chicken	C10-8	2018-08-13	Pink, circular, bile salts	+	Purple	+	H	18	29	28	26	20	28	32	32	< 0.25	O6	H45	fimH995	E or cladeI	D	148547	5573	-	SAMN20959670	GCA_019840345.1
Surrey058	2350	Escherichia ruysiae	Healthy chicken	C10-9	2018-08-13	Pink, circular, bile salts, ~irregular (rugous)	+	Purple	+	I	18	24	30	24	19	30	32	32	< 0.25	-	uncertain	*	cladeIII	cladeIII	148607	11513	-	SAMN20959671	GCA_019839765.1
Surrey059	2404	Escherichia coli	Healthy chicken	C11-2	2018-09-10	White, irregular	-	Purple	+	B	17	24	26	24	18	28	32	32	< 0.25	O9	H7	*	E	E	148578	11514	-	SAMN20959672	GCA_019840045.1
Surrey060	2407	Escherichia coli	Healthy chicken	C11-5	2018-09-10	Pink, ~irregular, bile salts	+	Purple	+	E	17	22	28	24	15	25	32	32	< 0.25	O141	H32	fimH1067	A	A	148567	2936	ST10 Cplx	SAMN20959673	GCA_019841025.1
Surrey061	2408	Escherichia coli	Healthy chicken	C11-6	2018-09-10	White, circular	-	Purple	+	D	17	24	28	25	18	26	32	30	< 0.25	O136	H10	fimH54	A	A	148573	2456	-	SAMN20959674	GCA_019840945.1
Surrey062	2410	Escherichia fergusonii	Healthy chicken	C11-8	2018-09-10	Pink, circular, bile salts	+	Purple	+	G	18	25	28	26	18	29	32	32	< 0.25	O45	H11	ND	fergusonii	fergusonii	148577	7059	-	SAMN20959675	GCA_019840905.1
Surrey063	2411	Escherichia ruysiae	Healthy chicken	C11-9	2018-09-10	Pink, circular, bile salts	+	Purple	+	H	17	24	28	26	20	28	30	32	< 0.25	-	uncertain	fimH610	cladeIII	cladeIII	148571	6540	-	SAMN20959676	GCA_019840085.1
Surrey064	2412	Escherichia coli	Healthy chicken	C11-10	2018-09-10	Pink, irregular, bile salts	+	Purple	+	I	17	22	27	25	20	25	28	28	< 0.25	B15 or O112	H2	*	B1	B1	148575	388	-	SAMN20959677	GCA_019840285.1
Surrey065	2413	Escherichia fergusonii	Healthy chicken	C12-1	2018-09-10	Pink, circular, bile salts, rugous	+	Purple	+	A	19	24	28	26	19	28	32	32	< 0.25	O5	H11	ND	fergusonii	fergusonii	148576	7059	-	SAMN20959678	GCA_019839805.1
Surrey066	2414	Escherichia coli	Healthy chicken	C12-2	2018-09-10	Pink, circular, bile salts	+	Purple	+	B	19	25	27	25	21	28	30	32	< 0.25	O103	H2	fimH32	B1	B1	148579	2307	-	SAMN20959679	GCA_019839985.1
Surrey067	2415	Escherichia coli	Healthy chicken	C12-3	2018-09-10	Pink, circular, bile salts	+	Purple	+	C	19	22	26	26	19	27	34	30	< 0.25	O55	H27	fimH41	A	A	148541	1112	-	SAMN20959680	GCA_019839945.1
Surrey068	2416	Escherichia coli	Healthy chicken	C12-4	2018-09-10	White, irregular	-	Purple	+	D	17	26	26	26	18	27	32	32	< 0.25	-	H10	fimH54	A	A	148574	2456	-	SAMN20959681	GCA_019840005.1
Surrey069	2419	Escherichia coli	Healthy chicken	C12-7	2018-09-10	Pink, circular, bile salts	+	Purple	+	G	18	24	28	24	21	27	32	32	< 0.25	-	H10	fimH54	A	A	148574	2456	-	SAMN20959682	GCA_019839475.1
Surrey070	2421	Escherichia coli	Healthy chicken	C12-9	2018-09-10	Pink, circular, bile salts	+	Purple	+	I	18	23	27	27	20	25	30	30	< 0.25	O133	H29	fimH31	D	E	148583	1204	-	SAMN20959683	GCA_019840065.1
Surrey071	2422	Escherichia coli	Healthy chicken	C12-10	2018-09-10	Pink, circular, bile salts	+	Purple	+	J	17	22	28	24	21	26	30	32	< 0.25	-	H10	fimH54	A	A	148574	2456	-	SAMN20959684	GCA_019839865.1
Surrey072	2423	Escherichia ruysiae	Healthy chicken	C13-1	2018-09-10	Pink, circular, bile salts	+	Purple	+	A	19	24	28	27	19	27	31	33	< 0.25	-	uncertain	*	cladeIII	cladeIII	148580	11513	-	SAMN20959685	GCA_019840475.1
Surrey073	2424	Escherichia coli	Healthy chicken	C13-2	2018-09-10	Pink, circular, bile salts	+	Purple	+	B	20	22	30	25	17	25	31	33	< 0.25	O6	H45	fimH995	E or cladeI	D	148547	5573	-	SAMN20959686	GCA_019840425.1
Surrey074	2425	Escherichia coli	Healthy chicken	C13-3	2018-09-10	Pink, circular, bile salts	+	Purple	+	C	19	22	30	23	20	26	30	32	< 0.25	-	H10	fimH121	B1	B1	148606	155	ST155 Cplx	SAMN20959687	GCA_019839445.1
Surrey075	2426	Escherichia coli	Healthy chicken	C13-4	2018-09-10	White, circular	-	Purple	+	D	18	22	27	23	16	26	30	29	< 0.25	-	H10	fimH54	A	A	148585	2456	-	SAMN20959688	GCA_019840195.1
Surrey076	2427	Escherichia ruysiae	Healthy chicken	C13-5	2018-09-10	White, irregular	-	Purple	+	E	20	23	26	24	16	27	32	32	< 0.25	-	uncertain	fimH610	cladeIII	cladeIII	148601	6540	-	SAMN20959689	GCA_019839665.1
Surrey077	2429	Escherichia coli	Healthy chicken	C13-7	2018-09-10	Pink, circular, bile salts, mucoid	+	Purple	+	G	20	21	28	23	21	26	32	29	< 0.25	O154	H4	fimH54	A	A	148586	10	ST10 Cplx	SAMN20959690	GCA_019840105.1
Surrey078	2432	Escherichia coli	Healthy chicken	C13-10	2018-09-10	Pink, circular, bile salts	+	Purple	+	J	17	23	25	27	19	27	31	31	< 0.25	O8	H49	fimH38	B1	B1	148564	1844	-	SAMN20959691	GCA_019839485.1
Surrey079	2433	Escherichia ruysiae	Healthy chicken	C14-1	2018-09-10	White, circular	-	Purple	+	A	20	23	27	24	18	27	30	30	< 0.25	uncertain	uncertain	*	cladeIV	CladeIV	148602	11516	-	SAMN20959692	GCA_019839365.1
Surrey080	2435	Escherichia coli	Healthy chicken	C14-3	2018-09-10	Pink, circular, bile salts	+	Purple	+	C	20	22	29	26	20	25	33	32	< 0.25	-	uncertain	fimH610	A	A	148571	6540	-	SAMN20959693	GCA_019839385.1
Surrey081	2437	Escherichia coli	Healthy chicken	C14-5	2018-09-10	Pink, irregular, bile salts, rugous	+	Purple	+	E	20	22	29	24	17	27	32	32	< 0.25	O118 or O151	H29	fimH400	A	A	148603	48	ST10 Cplx	SAMN20959694	GCA_019839775.1
Surrey082	2438	Escherichia coli	Healthy chicken	C14-6	2018-09-10	Pink, circular, bile salts	+	Purple	+	F	18	24	28	24	19	28	33	30	< 0.25	O9	H4	fimH34	A	A	148584	46	ST46 Cplx	SAMN20959695	GCA_019841285.1
Surrey083	2439	Escherichia marmotae	Healthy chicken	C14-7	2018-09-10	Pink, circular, bile salts	+	Purple	+	G	20	23	29	26	19	29	33	32	< 0.25	-	H56	fimH631	cladeV	cladeV	148582	11515	-	SAMN20959696	GCA_019841245.1
Surrey084	2441	Escherichia coli	Healthy chicken	C14-9	2018-09-10	Pink, circular, bile salts	+	Purple	+	H	20	23	26	24	18	27	33	34	< 0.25	O29	H10	fimH1343	A	A	148587	10	ST10 Cplx	SAMN20959697	GCA_019841325.1
Surrey085	2442	Escherichia fergusonii	Healthy chicken	C14-10	2018-09-10	Pink, circular, bile salts	+	Purple	+	I	18	20	26	26	18	23	32	30	< 0.25	O45	H11	ND	fergusonii	fergusonii	148556	7059	-	SAMN20959698	GCA_019839545.1
Surrey086	2443	Escherichia coli	Healthy chicken	C15-1	2018-09-10	Pink, ~irregular, bile salts, rugous	+	Purple	+	A	20	25	30	25	20	30	34	35	< 0.25	O8	H11	fimH54	A	A	148589	6018	ST10 Cplx	SAMN20959699	GCA_019839355.1
Surrey087	2444	Escherichia coli	Healthy chicken	C15-2	2018-09-10	Pink, circular, bile salts	+	Purple	+	B	18	0	30	25	18	26	31	32	< 0.25	O6	H45	fimH995	E or cladeI	D	148547	5573	-	SAMN20959700	GCA_019839925.1
Surrey088	2445	Escherichia marmotae	Healthy chicken	C15-3	2018-09-10	Pink, ~irregular, bile salts	+	Purple	+	C	19	24	30	23	21	28	34	32	< 0.25	O5	H56	*	cladeV	cladeV	148588	7416	-	SAMN20959701	GCA_019840275.1
Surrey089	2448	Escherichia coli	Healthy chicken	C15-6	2018-09-10	White, circular	-	Purple	+	E	18	25	32	25	16	29	33	32	< 0.25	O8	H51	fimH657	F	F	148548	1276	-	SAMN20959702	GCA_019840255.1
Surrey090	2450	Escherichia ruysiae	Healthy chicken	C15-8	2018-09-10	Pink, irregular, bile salts	+	Purple	+	F	18	22	30	25	17	27	32	31	< 0.25	O10	uncertain	fimH612	cladeIII	cladeIII	148599	2371	-	SAMN20959703	GCA_019840185.1
Surrey091	2452	Escherichia coli	Healthy chicken	C15-10	2018-09-10	Pink, circular, bile salts	+	Purple	+	H	19	21	30	25	20	27	32	30	< 0.25	-	H10	fimH54	A	A	148593	2456	-	SAMN20959704	GCA_019840125.1
Surrey092	2636	Escherichia coli	Healthy chicken	C16-2	2018-10-08	Pink, circular, bile salts	+	Purple	+	-	19	23	30	25	19	28	34	32	< 0.25	O185	H16	fimH86	B1	B1	148596	2280	-	SAMN20959705	GCA_019839345.1
Surrey093	2640	Escherichia ruysiae	Healthy chicken	C17-1	2018-10-08	Pink, circular, bile salts	+	Purple	+	-	19	23	29	26	21	28	34	32	< 0.25	uncertain	uncertain	fimH620	cladeIV	cladeIV	148595	4103	-	SAMN20959706	GCA_019839605.1
Surrey094	2646	Escherichia ruysiae	Healthy chicken	C18-2	2018-10-08	Pink, ~irregular, bile salts, rugous	+	Purple	+	-	18	23	28	24	18	28	34	31	< 0.25	uncertain	uncertain	*	cladeIII	cladeIII	148594	9287	-	SAMN20959707	GCA_019839675.1
Surrey095	2650	Escherichia coli	Healthy chicken	C19-1	2018-10-08	Pink, circular, bile salts	+	Purple	+	-	20	26	26	23	20	26	32	32	< 0.25	-	H38	fimH23	A	A	148597	3231	-	SAMN20959708	GCA_019839525.1
Surrey096	2656	Escherichia coli	Healthy chicken	C20-2	2018-10-08	Pink, circular, bile salts	+	Purple	+	-	21	24	29	24	20	29	34	32	< 0.25	O6	H45	fimH995	E or cladeI	D	148598	5573	-	SAMN20959709	GCA_019841125.1
Surrey097	2710	Escherichia marmotae	Healthy chicken	C21-1	2018-11-12	Pink, irregular, bile salts	+	Purple	+	-	20	26	27	25	22	29	34	33	< 0.25	O5	H56	*	cladeV	cladeV	148590	7416	-	SAMN20959710	GCA_019841225.1
Surrey098	2716	Escherichia coli	Healthy chicken	C22-2	2018-11-12	Pink, circular, bile salts	+	Purple	+	-	19	23	29	25	19	28	34	32	< 0.25	O6	H45	fimH995	E or cladeI	D	148592	5573	-	SAMN20959711	GCA_019839425.1
Surrey099	2721	Escherichia coli	Healthy chicken	C23-2	2018-11-12	Pink, circular, bile salts	+	Purple	+	-	17	22	30	28	17	28	33	31	< 0.25	-	H16	fimH31	B1	B1	151492	453	ST86 Cplx	SAMN20959712	GCA_019841905.1
Surrey100	2725	Escherichia coli	Healthy chicken	C24-1	2018-11-12	Pink, circular, bile salts	+	Purple	+	-	17	23	26	23	19	29	33	31	< 0.25	O147	H40	fimH23	A	A	145793	165	ST165 Cplx	SAMN20959713	GCA_019841865.1
