# Supplementary material for: Remarkable genomic diversity among Escherichia isolates recovered from healthy chickens
Source: PeerJ. 2022 Mar 1;10:e12935. doi: 10.7717/peerj.12935 (PMC8896058; doi:10.7717/peerj.12935)
Supplement: Supplemental Information 5 — The isolate with the highest genome quality score in each cluster was used as the representative for that cluster. [file peerj-10-12935-s005.xlsx]

## Sheet: Table S3
Table S3: HierCC HC0 level clusters of the original 100 isolates with genome quality scores. The isolate with the highest genome quality score in each cluster was used as the representative for that cluster.
Clustering	HC0	isolates	SNPs	Genome scores (assembly_name, score)					Rep isolate
C1	148525	021, 043	124	Surrey021.EB.fasta,100.542	Surrey043.EB.fasta,100.522				021
C2	148529	007, 037	21	Surrey007.EB.fasta,98.834	Surrey037.EB.fasta,98.852				037
C3	148537	024, 032	11	Surrey024.EB.fasta,101.622	Surrey032.EB.fasta,101.622				032
C4	148541	026, 067	6	Surrey026.EB.fasta,102.320	Surrey067.EB.fasta,102.369				067
C5	148542	006, 055	11	Surrey006.EB.fasta,102.197	Surrey055.EB.fasta,88.846				006
C6	148547	025, 041, 057, 073, 087	see Table 2	Surrey025.EB.fasta,102.075	Surrey041.EB.fasta,102.061	Surrey057.EB.fasta,102.061	Surrey073.EB.fasta,102.061	Surrey087.EB.fasta,102.061	025
C7	148548	034, 089	18	Surrey034.EB.fasta,100.186	Surrey089.EB.fasta,100.156				034
C8	148555	018, 042	20	Surrey018.EB.fasta,101.751	Surrey042.EB.fasta,101.760				042
C9	148556	045, 085	55	Surrey045.EB.fasta,101.637	Surrey085.EB.fasta,101.576				045
C10	148564	019, 050, 078	see Table 2	Surrey019.EB.fasta,101.679	Surrey050.EB.fasta,101.735	Surrey078.EB.fasta,101.734			050
C11	148571	063, 080	257	Surrey063.EB.fasta,102.680	Surrey080.EB.fasta,102.433				063
C12	148574	068, 069, 071	see Table 2	Surrey068.EB.fasta,100.045	Surrey069.EB.fasta,100.012	Surrey071.EB.fasta,100.041			068
C13	148603	004, 081	2	Surrey004.EB.fasta,101.777	Surrey081.EB.fasta,101.760				004
C14	148607	020, 058	143	Surrey020.EB.fasta,102.328	Surrey058.EB.fasta,102.418				058
