# Supplementary material for: Remarkable genomic diversity among Escherichia isolates recovered from healthy chickens
Source: PeerJ. 2022 Mar 1;10:e12935. doi: 10.7717/peerj.12935 (PMC8896058; doi:10.7717/peerj.12935)
Supplement: Supplemental Information 8 — Contigs were identified as chromosome- or plasmid-associated using platon v.1.6, and all plasmid-associated contigs wer eused as input for ABRicate. Parameters used were: minimum coverage = 90% and minimum identity = 80%. Gene presence is denoted by its coverage (%). Gene absence is represented by a full stop. Only samples and genes with hits are included in the table. [file peerj-10-12935-s008.xlsx]

## Sheet: Table S6
Table S6: Summary output from ABRicate using our custom virulence-associated gene database for plasmid-related contigs from 81 isolates of Escherichia. Contigs were identified as chromosome- or plasmid-associated using platon v.1.6, and all plasmid-associated contigs wer eused as input for ABRicate. Parameters used were: minimum coverage = 90% and minimum identity = 80%. Gene presence is denoted …
#FILE	NUM_FOUND	hlyF	iroN	iss	iucD	iutA	sitA	traT
Surrey002.EB_platon.plasmid.fasta	2	100	.	.	.	.	.	100
Surrey003.EB_platon.plasmid.fasta	1	.	.	.	.	.	.	100
Surrey009.EB_platon.plasmid.fasta	1	.	.	.	.	.	.	100
Surrey010.EB_platon.plasmid.fasta	3	.	100	100	.	.	.	100
Surrey011.EB_platon.plasmid.fasta	1	.	.	.	.	.	.	100
Surrey013.EB_platon.plasmid.fasta	7	100	100	100	100	100	100	100
Surrey015.EB_platon.plasmid.fasta	1	.	.	.	.	.	.	100
Surrey016.EB_platon.plasmid.fasta	1	.	.	.	.	.	.	100
Surrey017.EB_platon.plasmid.fasta	4	100	.	.	100	100	100	.
Surrey027.EB_platon.plasmid.fasta	1	.	.	.	.	.	.	100
Surrey033.EB_platon.plasmid.fasta	2	100	100	.	.	.	.	.
Surrey034.EB_platon.plasmid.fasta	7	100	100	100	100	100	100	100
Surrey037.EB_platon.plasmid.fasta	1	.	.	.	.	.	.	100
Surrey040.EB_platon.plasmid.fasta	1	.	.	.	.	.	.	100
Surrey048.EB_platon.plasmid.fasta	1	.	.	.	.	.	.	100
Surrey050.EB_platon.plasmid.fasta	4	100	100	100	.	.	.	100
Surrey067.EB_platon.plasmid.fasta	1	.	.	.	.	.	.	100
Surrey074.EB_platon.plasmid.fasta	1	.	.	.	.	.	.	100
Surrey082.EB_platon.plasmid.fasta	2	.	100	.	.	.	.	100
Surrey099.EB_platon.plasmid.fasta	1	.	.	.	.	.	.	100
