# Supplementary material for: Remarkable genomic diversity among Escherichia isolates recovered from healthy chickens
Source: PeerJ. 2022 Mar 1;10:e12935. doi: 10.7717/peerj.12935 (PMC8896058; doi:10.7717/peerj.12935)
Supplement: Supplemental Information 10 — Parameters used were: minimum coverage = 90% and minimum identity = 80%. Isolates that do not appear had no matching genes using these search parameters. Gene presence is denoted by its coverage (%). Gene absence is represented by a full stop. [file peerj-10-12935-s010.xlsx]

## Sheet: Table S8
Table S8: Summary output from ABRicate using the NCBI AMRFinderPlus database for 81 isolates of Escherichia. Parameters used were: minimum coverage = 90% and minimum identity = 80%. Isolates that do not appear had no matching genes using these search parameters. Gene presence is denoted by its coverage (%). Gene absence is represented by a full stop.
#FILE	NUM_FOUND	aadA1	aph(3'')-Ib	aph(6)-Id	blaEC	blaEC-13	blaEC-15	blaEC-18	blaEC-19	blaEC-8	blaTEM-1	blaTEM-116	dfrA17	dfrA5	fosA7.5	sul2	tet(A)	tet(B)
Surrey001.EB.fasta	1	.	.	.	.	.	.	100	.	.	.	.	.	.	.	.	.	.
Surrey002.EB.fasta	3	.	.	.	.	.	.	100	.	.	.	.	91.56	.	.	100	.	.
Surrey003.EB.fasta	1	.	.	.	.	.	100	.	.	.	.	.	.	.	.	.	.	.
Surrey004.EB.fasta	1	.	.	.	.	.	100	.	.	.	.	.	.	.	.	.	.	.
Surrey005.EB.fasta	1	.	.	.	100	.	.	.	.	.	.	.	.	.	.	.	.	.
Surrey006.EB.fasta	1	.	.	.	.	.	100	.	.	.	.	.	.	.	.	.	.	.
Surrey008.EB.fasta	1	.	.	.	.	.	100	.	.	.	.	.	.	.	.	.	.	.
Surrey009.EB.fasta	1	.	.	.	.	.	100	.	.	.	.	.	.	.	.	.	.	.
Surrey010.EB.fasta	1	.	.	.	100	.	.	.	.	.	.	.	.	.	.	.	.	.
Surrey011.EB.fasta	1	.	.	.	.	.	.	100	.	.	.	.	.	.	.	.	.	.
Surrey012.EB.fasta	2	.	.	.	.	.	100	.	.	.	.	.	.	.	.	.	.	100
Surrey013.EB.fasta	2	.	.	.	.	.	.	100	.	.	.	.	.	100	.	.	.	.
Surrey014.EB.fasta	2	.	.	.	.	.	100	.	.	.	.	.	.	.	.	.	100	.
Surrey015.EB.fasta	1	.	.	.	.	.	.	100	.	.	.	.	.	.	.	.	.	.
Surrey016.EB.fasta	2	.	.	.	100	.	.	.	.	.	.	.	.	.	.	.	100	.
Surrey017.EB.fasta	2	.	.	.	.	100	.	.	.	.	.	.	.	.	.	.	.	100
Surrey021.EB.fasta	1	.	.	.	.	.	.	.	.	100	.	.	.	.	.	.	.	.
Surrey022.EB.fasta	1	.	.	.	100	.	.	.	.	.	.	.	.	.	.	.	.	.
Surrey023.EB.fasta	1	.	.	.	.	.	100	.	.	.	.	.	.	.	.	.	.	.
Surrey025.EB.fasta	1	.	.	.	100	.	.	.	.	.	.	.	.	.	.	.	.	.
Surrey027.EB.fasta	1	.	.	.	.	.	100	.	.	.	.	.	.	.	.	.	.	.
Surrey028.EB.fasta	1	.	.	.	.	.	100	.	.	.	.	.	.	.	.	.	.	.
Surrey029.EB.fasta	1	.	.	.	.	.	100	.	.	.	.	.	.	.	.	.	.	.
Surrey030.EB.fasta	1	.	.	.	.	.	.	.	.	100	.	.	.	.	.	.	.	.
Surrey031.EB.fasta	4	.	100	100	.	.	.	.	.	100	.	.	.	.	.	.	.	100
Surrey032.EB.fasta	2	.	.	.	.	.	100	.	.	.	100	.	.	.	.	.	.	.
Surrey033.EB.fasta	4	.	100	100	.	.	100	.	.	.	.	.	.	.	.	.	.	100
Surrey034.EB.fasta	4	.	100	100	.	.	.	.	100	.	.	.	.	.	.	.	.	100
Surrey036.EB.fasta	1	.	.	.	.	100	.	.	.	.	.	.	.	.	.	.	.	.
Surrey037.EB.fasta	1	.	.	.	.	.	.	100	.	.	.	.	.	.	.	.	.	.
Surrey038.EB.fasta	2	.	.	.	.	.	100	.	.	.	.	.	.	.	.	.	100	.
Surrey039.EB.fasta	1	.	.	.	.	.	100	.	.	.	.	.	.	.	.	.	.	.
Surrey040.EB.fasta	1	.	.	.	100	.	.	.	.	.	.	.	.	.	.	.	.	.
Surrey042.EB.fasta	1	.	.	.	.	.	100	.	.	.	.	.	.	.	.	.	.	.
Surrey044.EB.fasta	2	.	.	.	.	.	100	.	.	.	.	.	.	.	.	.	100	.
Surrey045.EB.fasta	1	.	.	.	.	.	.	.	.	100	.	.	.	.	.	.	.	.
Surrey046.EB.fasta	1	.	.	.	100	.	.	.	.	.	.	.	.	.	.	.	.	.
Surrey047.EB.fasta	1	.	.	.	.	.	100	.	.	.	.	.	.	.	.	.	.	.
Surrey048.EB.fasta	1	.	.	.	.	.	100	.	.	.	.	.	.	.	.	.	.	.
Surrey049.EB.fasta	1	.	.	.	.	.	100	.	.	.	.	.	.	.	.	.	.	.
Surrey050.EB.fasta	1	.	.	.	.	.	.	100	.	.	.	.	.	.	.	.	.	.
Surrey051.EB.fasta	1	.	.	.	100	.	.	.	.	.	.	.	.	.	.	.	.	.
Surrey052.EB.fasta	2	.	.	.	.	.	100	.	.	.	.	100	.	.	.	.	.	.
Surrey053.EB.fasta	1	.	.	.	100	.	.	.	.	.	.	.	.	.	.	.	.	.
Surrey054.EB.fasta	1	.	.	.	.	.	.	100	.	.	.	.	.	.	.	.	.	.
Surrey056.EB.fasta	1	.	.	.	.	.	100	.	.	.	.	.	.	.	.	.	.	.
Surrey058.EB.fasta	1	.	.	.	.	.	100	.	.	.	.	.	.	.	.	.	.	.
Surrey059.EB.fasta	1	.	.	.	100	.	.	.	.	.	.	.	.	.	.	.	.	.
Surrey060.EB.fasta	2	.	.	.	.	.	100	.	.	.	.	.	.	.	.	.	100	.
Surrey061.EB.fasta	2	.	.	.	.	.	100	.	.	.	.	.	.	.	.	.	100	.
Surrey062.EB.fasta	1	.	.	.	.	.	.	.	.	100	.	.	.	.	.	.	.	.
Surrey063.EB.fasta	1	.	.	.	.	.	100	.	.	.	.	.	.	.	.	.	.	.
Surrey064.EB.fasta	1	.	.	.	.	.	.	100	.	.	.	.	.	.	.	.	.	.
Surrey065.EB.fasta	1	.	.	.	.	.	.	.	.	100	.	.	.	.	.	.	.	.
Surrey066.EB.fasta	2	.	.	.	.	.	.	100	.	.	.	.	.	.	99.05	.	.	.
Surrey067.EB.fasta	1	.	.	.	100	.	.	.	.	.	.	.	.	.	.	.	.	.
Surrey068.EB.fasta	2	.	.	.	.	.	100	.	.	.	.	.	.	.	.	.	100	.
Surrey070.EB.fasta	1	.	.	.	100	.	.	.	.	.	.	.	.	.	.	.	.	.
Surrey072.EB.fasta	1	.	.	.	.	.	100	.	.	.	.	.	.	.	.	.	.	.
Surrey074.EB.fasta	1	.	.	.	.	.	.	100	.	.	.	.	.	.	.	.	.	.
Surrey075.EB.fasta	1	.	.	.	.	.	100	.	.	.	.	.	.	.	.	.	.	.
Surrey076.EB.fasta	1	.	.	.	.	.	100	.	.	.	.	.	.	.	.	.	.	.
Surrey077.EB.fasta	1	.	.	.	100	.	.	.	.	.	.	.	.	.	.	.	.	.
Surrey079.EB.fasta	1	.	.	.	.	.	100	.	.	.	.	.	.	.	.	.	.	.
Surrey082.EB.fasta	4	.	100	100	.	.	100	.	.	.	.	.	.	.	.	.	.	100
Surrey083.EB.fasta	1	.	.	.	.	.	99.91	.	.	.	.	.	.	.	.	.	.	.
Surrey084.EB.fasta	1	.	.	.	100	.	.	.	.	.	.	.	.	.	.	.	.	.
Surrey086.EB.fasta	1	.	.	.	.	.	100	.	.	.	.	.	.	.	.	.	.	.
Surrey090.EB.fasta	1	.	.	.	.	.	100	.	.	.	.	.	.	.	.	.	.	.
Surrey091.EB.fasta	1	.	.	.	.	.	100	.	.	.	.	.	.	.	.	.	.	.
Surrey092.EB.fasta	1	.	.	.	.	100	.	.	.	.	.	.	.	.	.	.	.	.
Surrey093.EB.fasta	1	.	.	.	.	.	100	.	.	.	.	.	.	.	.	.	.	.
Surrey094.EB.fasta	1	.	.	.	.	.	100	.	.	.	.	.	.	.	.	.	.	.
Surrey095.EB.fasta	1	.	.	.	100	.	.	.	.	.	.	.	.	.	.	.	.	.
Surrey096.EB.fasta	1	.	.	.	100	.	.	.	.	.	.	.	.	.	.	.	.	.
Surrey098.EB.fasta	1	.	.	.	100	.	.	.	.	.	.	.	.	.	.	.	.	.
Surrey099.EB.fasta	4	100	.	.	.	100	.	.	.	.	.	100	.	.	.	.	100	.
Surrey100.EB.fasta	1	.	.	.	100	.	.	.	.	.	.	.	.	.	.	.	.	.
